# Supplementary material for: A New Species of Euphlyctis (Anura: Dicroglossidae) from Barisal, Bangladesh
Source: PLoS One. 2015 Feb 4;10(2):e0116666. doi: 10.1371/journal.pone.0116666 (PMC4317184; doi:10.1371/journal.pone.0116666)

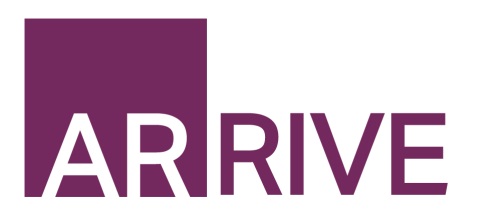


The ARRIVE Guidelines Checklist

Animal Research: Reporting In Vivo Experiments

Carol Kilkenny1, William J Browne2, Innes C Cuthill3, Michael Emerson4 and Douglas G Altman5

*1The National Centre for the Replacement, Refinement and Reduction of Animals in Research, London, UK, 2School of Veterinary Science, University of Bristol, Bristol, UK, 3School of Biological Sciences, University of Bristol, Bristol, UK, 4National Heart and Lung Institute, Imperial College London, UK, 5Centre for Statistics in Medicine, University of Oxford, Oxford, UK.*

|  | | ITEM | RECOMMENDATION | Section/ Paragraph |
| --- | --- | --- | --- | --- |
|  | 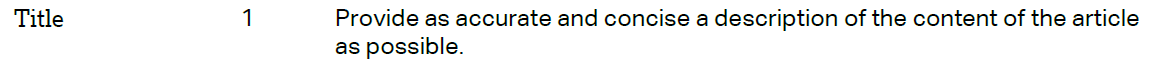 | | | Provided |
|  | 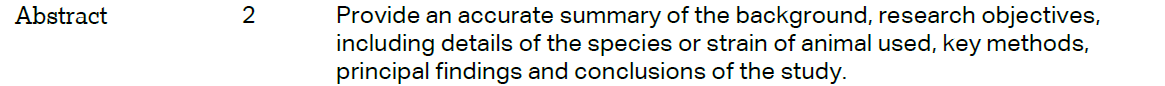 | | | Provided |
|  | INTRODUCTION | | |  |
|  | 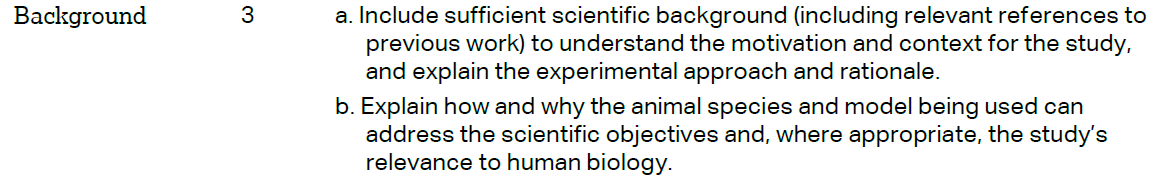 | | | Provided |
|  | 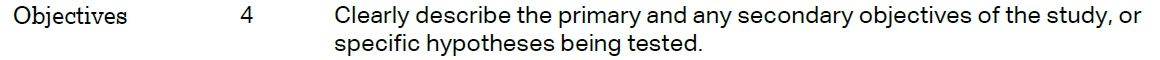 | | | Provided |
|  | METHODS | | |  |
|  | 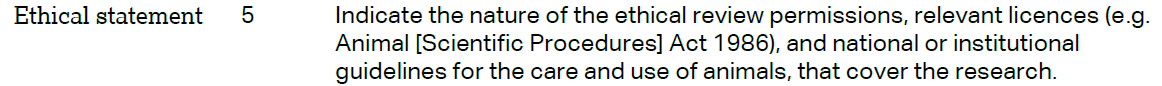 | | | Provided |
|  | 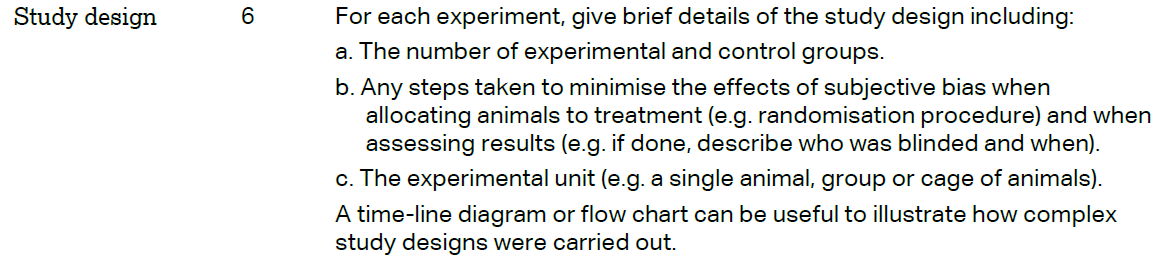 | | | Provided |
|  | 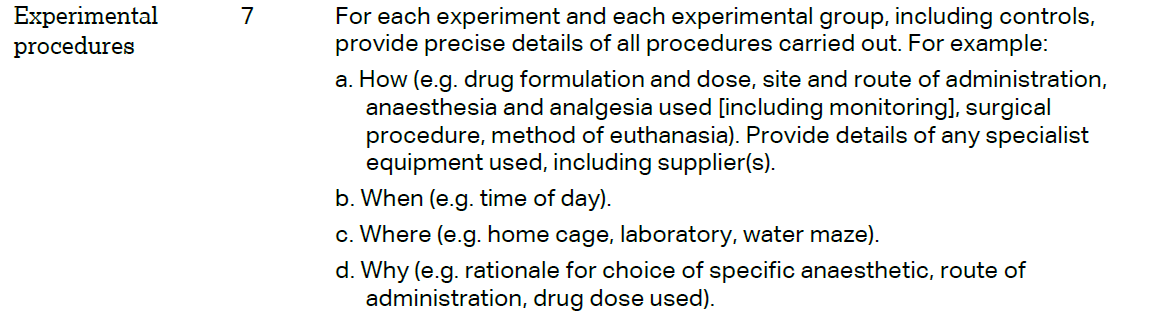 | | | Provided |
|  | 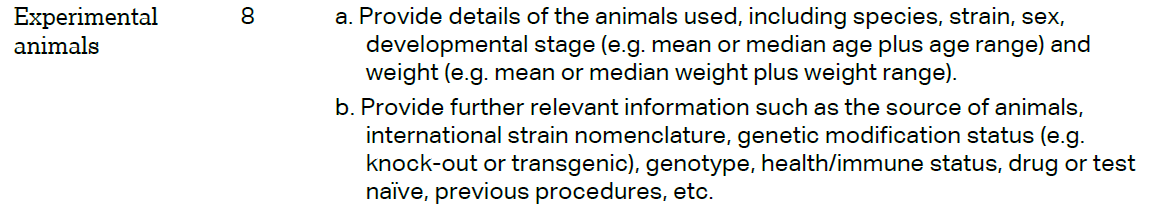 | | | Provided |

The ARRIVE guidelines. Originally published in *PLoS Biology*, June 20101

|  | 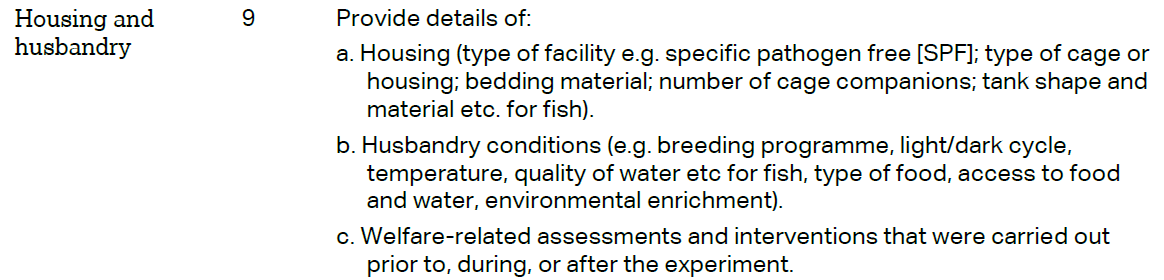 | Not applicable | |
| --- | --- | --- | --- |
|  | 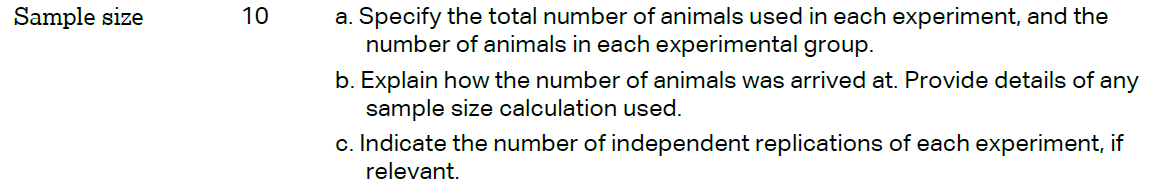 | Provided | |
|  | 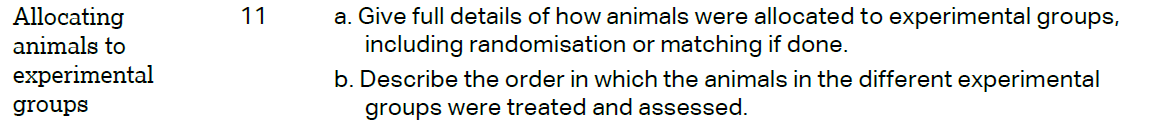 | Not applicable | |
|  | 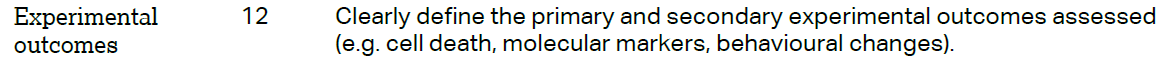 | Provided | |
|  | 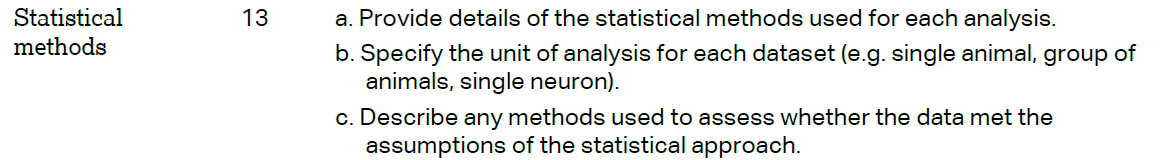 | Provided | |
|  | RESULTS |  | |
|  | 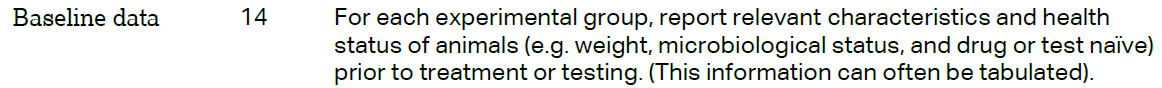 | Not applicable | |
|  | 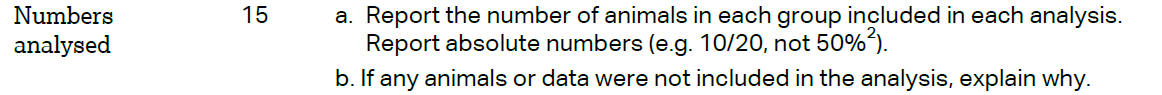 | Provided | |
|  | 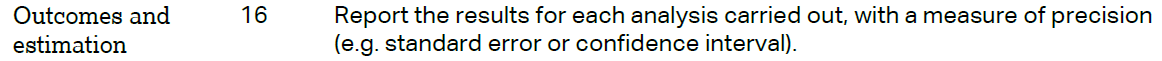 | Provided | |
|  | 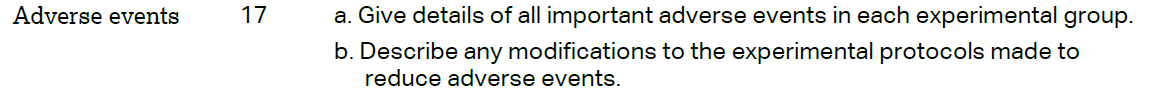 | Not applicable | |
|  | DISCUSSION |  | |
|  | 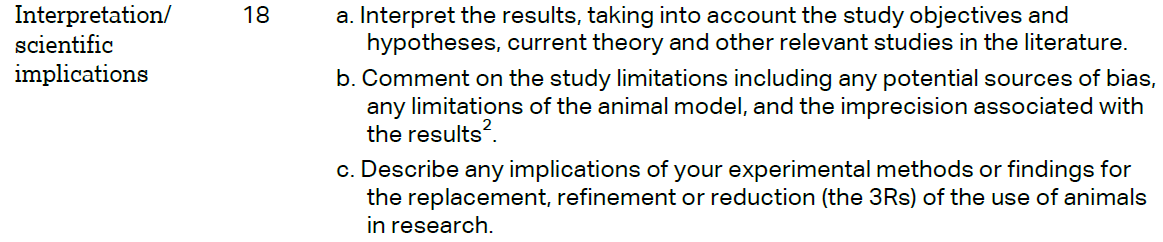 | Provided | |
|  | 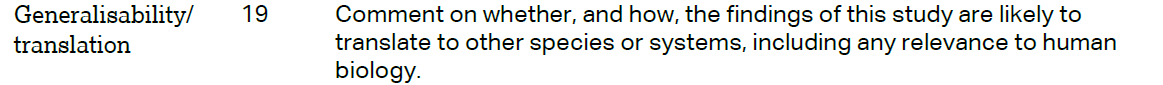 | Not applicable | |
| 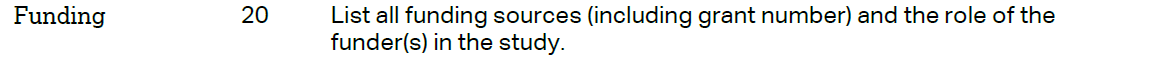 | | Provided |  |


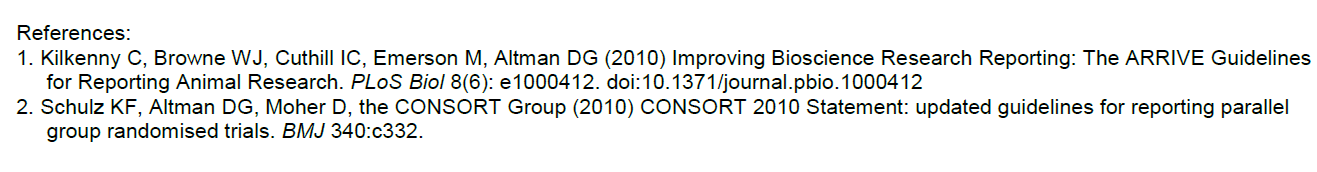

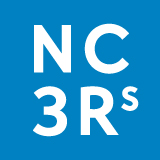

Supplement: S1 ARRIVE Checklist. — (DOC) [file pone.0116666.s001.doc]
